# Supplementary material for: Expression Analysis of Muscle-Specific miRNAs in Plasma-Derived Extracellular Vesicles from Patients with Chronic Obstructive Pulmonary Disease
Source: MDPI journal article supplement (doi:10.3390/diagnostics10070502), 2020-07-21

## Supplementary Materials:

**Figure S1:** ROC curve analysis of the three striated muscle-specific microRNAs (miR-206, miR-133a-5p, and miR-133a-3p.2), which were significantly up-regulated in plasma-derived extracellular vesicles from group B of chronic obstructive pulmonary disease (COPD) patients in comparison with group A, C, and D. ROC, receiver operating characteristic.

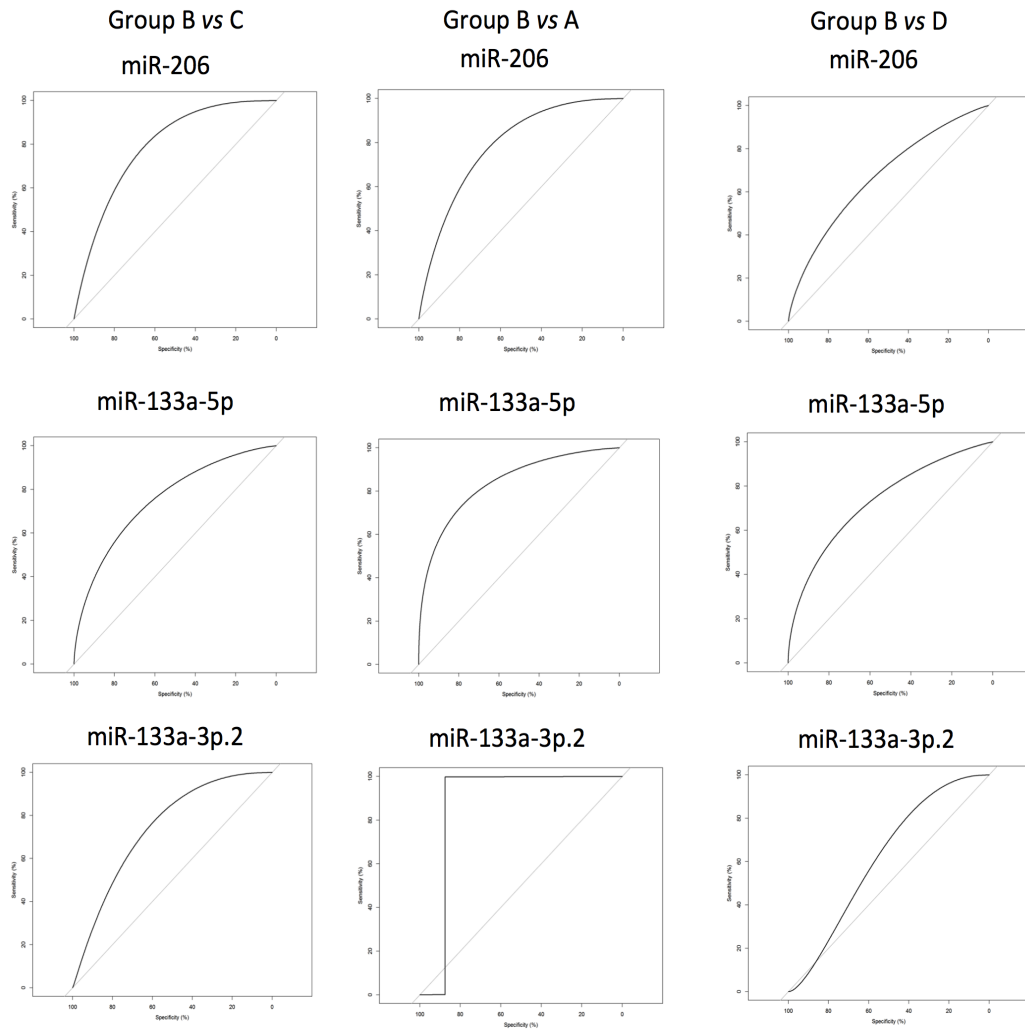

Supplement: s1 [file s1]
